# Supplementary material for: Estimating the burden of hypertension and its significant risk factors among male commercial drivers in sub-Saharan Africa: A systematic review and meta-analysis
Source: HighWire-hosted journal article supplement (doi:10.1136/bmjopen-2021-053825), 2021-12-01
Supplement: bmjopen-2021-053825supp002_data_supplement.pdf [file bmjopen-2021-053825supp002_data_supplement.pdf]

*Supplementary file 2: Quality assessment of the included individual studies*

| Author and year                   | Q1 | Q2 | Q3 | Q4 | Q5 | Q6 | Q7 | Q8 | Q9 | Score (%) | RoB  | Decision |
|-----------------------------------|----|----|----|----|----|----|----|----|----|-----------|------|----------|
| Appiah et al. <sup>21</sup>       | Y  | N  | U  | Y  | Y  | Y  | Y  | Y  | U  | 67        | High | Included |
| Shownade et al. <sup>22</sup>     | Y  | N  | Y  | Y  | Y  | Y  | Y  | Y  | U  | 78        | Low  | Included |
| Oyeniya et al. <sup>23</sup>      | Y  | Y  | Y  | Y  | Y  | Y  | Y  | Y  | Y  | 100       | Low  | Included |
| Lalla-Edward et al. <sup>24</sup> | Y  | N  | Y  | Y  | Y  | Y  | Y  | Y  | U  | 78        | Low  | Included |
| Setorglo et al. <sup>25</sup>     | Y  | Y  | Y  | Y  | Y  | Y  | Y  | Y  | U  | 89        | Low  | Included |
| Aban <sup>26</sup>                | Y  | Y  | Y  | Y  | Y  | Y  | Y  | Y  | U  | 89        | Low  | Included |
| Anto et al. <sup>9</sup>          | Y  | Y  | Y  | Y  | Y  | Y  | Y  | Y  | U  | 89        | Low  | Included |
| Odeyinka et al. <sup>13</sup>     | Y  | Y  | Y  | Y  | Y  | Y  | Y  | Y  | Y  | 100       | Low  | Included |
| Yosef <sup>27</sup>               | Y  | Y  | Y  | Y  | Y  | Y  | Y  | Y  | Y  | 100       | Low  | Included |
| Adedokun et al. <sup>12</sup>     | Y  | Y  | Y  | Y  | Y  | Y  | Y  | Y  | U  | 89        | Low  | Included |
| Amoran et al. <sup>28</sup>       | Y  | Y  | Y  | Y  | Y  | Y  | Y  | Y  | U  | 89        | Low  | Included |
| Amadi et al. <sup>29</sup>        | Y  | Y  | Y  | Y  | Y  | Y  | Y  | Y  | Y  | 100       | Low  | Included |
| Tobin et al. <sup>30</sup>        | Y  | Y  | Y  | Y  | Y  | Y  | Y  | Y  | Y  | 100       | Low  | Included |
| Erhiano et al. <sup>31</sup>      | Y  | Y  | Y  | Y  | Y  | Y  | Y  | Y  | U  | 89        | Low  | Included |

RoB=Risk of Bias, Y=Yes, N=No, U=Uncertain, Q=Question

Q1-Was the sample frame appropriate to address the target population?

Q2-Were study participants sampled in an appropriate way?

Q3-Was the sample size adequate?

Q4-Were the study subjects and the setting described in detail?

Q5-Was the data analysis conducted with sufficient coverage of the identified sample?

Q6-Were valid methods used for the identification of the condition?

Q7-Was the condition measured in a standard, reliable way for all participants?

Q8-Was there appropriate statistical analysis?

Q9-Was the response rate adequate, and if not, was the low response rate managed appropriately?
